# Supplementary material for: The Oxindole Derivatives, New Promising GSK-3β Inhibitors as One of the Potential Treatments for Alzheimer’s Disease—A Molecular Dynamics Approach
Source: MDPI journal article supplement (doi:10.3390/biology10040332), 2021-04-15
Supplement: s1 [file s1]

# The Oxindole Derivatives, new Promising GSK-3 $\beta$ Inhibitors as One of the Potential Treatments for Alzheimer's Disease – a Molecular Dynamics Approach

Przemysław Czeleń<sup>a\*</sup>, and Beata Szeffler<sup>a</sup>

<sup>a</sup>Department of Physical Chemistry, Faculty of Pharmacy, Collegium Medicum, Nicolaus Copernicus University, Kurpińskiego 5, 85-096 Bydgoszcz, Poland

\* Correspondence: Przemysław Czeleń [przemekcz@cm.umk.pl](mailto:przemekcz@cm.umk.pl)

## Supplementary Materials

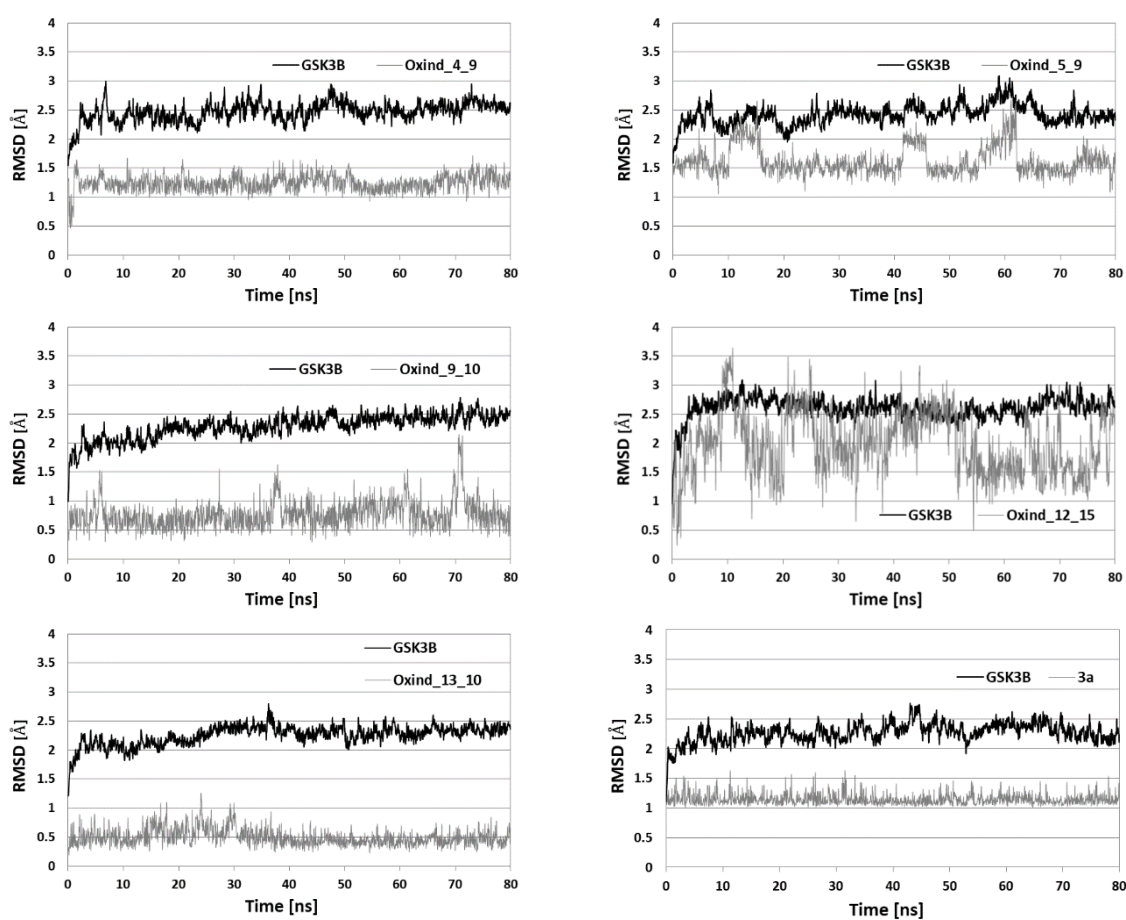

**Figure S1.** Distributions of RMSD values. Black colour refers to GSK-3 $\beta$  protein while gray refers to ligand molecules.

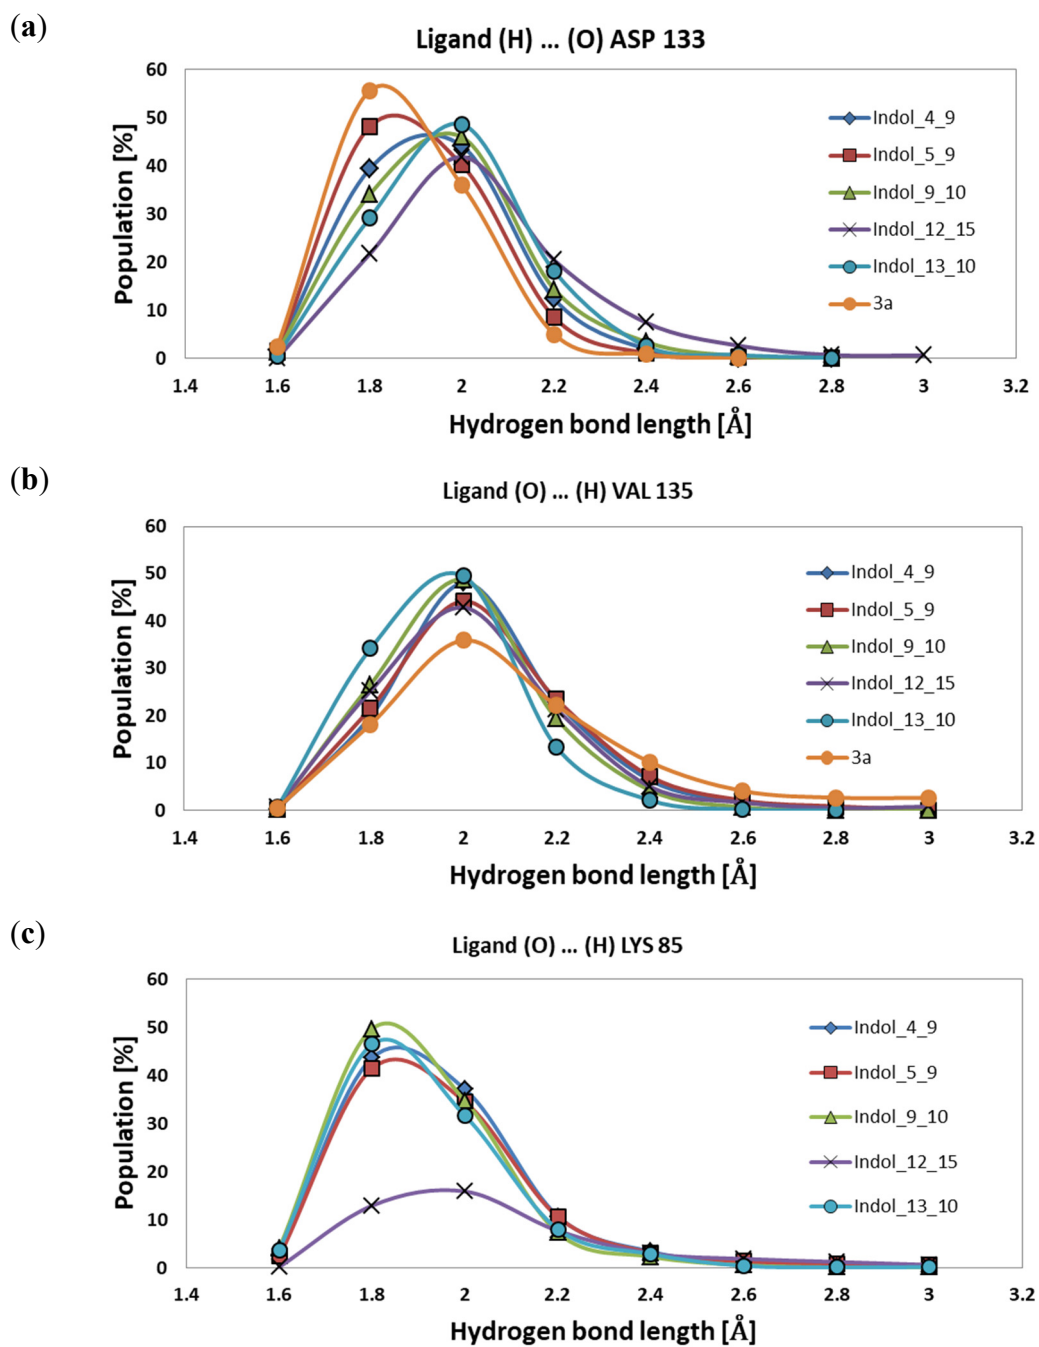

**Figure S2.** Distributions of the most frequently created hydrogen bonds between ligand molecules and selected amino acids from the GSK-3 $\beta$  active site (a)ASP133, (b) VAL135, (c) LYS85.

**Table S2.** Interactions of oxindole derivatives with amino acids from GSK-3 $\beta$  active site, estimated during docking stage.

| <b>Amino<br/>Acid</b> | <b>Hydrogen-Bond Length</b> |                  |                   |                    |                    |
|-----------------------|-----------------------------|------------------|-------------------|--------------------|--------------------|
|                       | <b>Oxind_4_9</b>            | <b>Oxind_5_9</b> | <b>Oxind_9_10</b> | <b>Oxind_12_15</b> | <b>Oxind_13_10</b> |
| ASP 133               | 2.4                         | 1.97             | 2.19              | 2.57               | 2.41               |
| VAL 135               | 2.02                        | 1.82             | 1.94              | 2.27               | 2.07               |
| LYS 85                | 2.42                        | 2.46             | 2.24              | 2.18               | 2.21               |
| ASN 64                | 2.73                        | 1.93             | ---               | ---                | 2.37               |
| THR 138               | 2.85                        | 2.96             | ---               | ---                | ---                |
| ARG 141               | 3.07                        | 2.86             | 3.02              | 2.65 ; 2.76        | 2.88               |
| PRO 136               | ---                         | ---              | 2.4               | ---                | ---                |
| LYS 183               | ---                         | ---              | 2.29 ; 2.66       | ---                | ---                |
| THR 134               | ---                         | ---              | ---               | ---                | 2.23               |

Table S1. The characteristics of affinities and molecular descriptors of analysed oxindole derivatives. ( $\Delta G$  –ligand binding affinity; IC –Inhibition constant ; Tox – index of toxicity; logP –octanol/water coefficient; MW – molecular weight; n HbA- number of hydrogen bond acceptors; n HbD – number of hydrogen bond donors.) Part of the data covering the molecular properties of chosen derivatives was previously published in the work dedicated to inhibition of the CDK2 enzyme [21]

| Name       | SMILES                                                                                | $\Delta G$<br>[kcal/mol] | IC<br>[nM] | logP  | Tox  | MW<br>[g/mol] | n HbA | n HbD |
|------------|---------------------------------------------------------------------------------------|--------------------------|------------|-------|------|---------------|-------|-------|
| Oxind_4_1  | <chem>c12c(cc(cc1)C(=O)NCn1c(=O)[nH]cc1)/C(=C/CCc1nonc1N)/C(=O)N2</chem>              | -10.36                   | 25.47      | 0.31  | 0.97 | 395.38        | 11    | 5     |
| Oxind_4_2  | <chem>c12c(cc(cc1)C(=O)NCn1c(=O)[nH]cc1)/C(=C/CCCc1nc[nH]c1)/C(=O)N2</chem>           | -10                      | 46.76      | 1.07  | 0.79 | 392.42        | 9     | 4     |
| Oxind_4_5  | <chem>c12c(cc(cc1)C(=O)NCn1c(=O)[nH]cc1)/C(=C/CC1=CC(=NC1=O)NC)/C(=O)N2</chem>        | -10.6                    | 16.99      | -1.32 | 0.43 | 406.4         | 10    | 4     |
| Oxind_4_9  | <chem>c12c(cc(cc1)C(=O)NCn1c(=O)[nH]cc1)/C(=C/Cc1cc(cc1)NC)C(F)(F)F/C(=O)N2</chem>    | -11.4                    | 4.40       | 3.58  | 0.32 | 471.44        | 8     | 4     |
| Oxind_4_10 | <chem>c12c(cc(cc1)C(=O)NCn1c(=O)[nH]cc1)/C(=C/Cc1cc(ccc1)C(=O)O)/C(=O)N2</chem>       | -11.14                   | 6.83       | 2.04  | 0.07 | 418.41        | 9     | 4     |
| Oxind_4_11 | <chem>c12c(cc(cc1)C(=O)NCn1c(=O)[nH]cc1)/C(=C/Cc1ccnc(n1)N)/C(=O)N2</chem>            | -10.58                   | 17.57      | -0.01 | 0.88 | 391.39        | 10    | 5     |
| Oxind_4_12 | <chem>c12c(cc(cc1)C(=O)NCn1c(=O)[nH]cc1)/C(=C/CNc1ccc(cc1)Br)/C(=O)N2</chem>          | -10.52                   | 19.44      | 2.80  | 0.35 | 468.31        | 8     | 4     |
| Oxind_4_13 | <chem>c12c(cc(cc1)C(=O)NCn1c(=O)[nH]cc1)/C(=C/CC1CCNCC1)/C(=O)N2</chem>               | -10.46                   | 21.51      | 1.41  | 0.17 | 381.44        | 8     | 4     |
| Oxind_4_14 | <chem>c12c(cc(cc1)C(=O)NCn1c(=O)[nH]cc1)/C(=C/CC1CCN(CC1)S(=O)(=O)C)/C(=O)N2</chem>   | -10.78                   | 12.54      | 0.12  | 0.01 | 459.53        | 10    | 3     |
| Oxind_4_15 | <chem>c12c(cc(cc1)C(=O)NCn1c(=O)[nH]cc1)/C(=C/CCc1ccc(cc1)S(=O)(=O)N)/C(=O)N2</chem>  | -10.8                    | 12.12      | 0.45  | 0.01 | 467.51        | 10    | 5     |
| Oxind_4_18 | <chem>c12c(cc(cc1)C(=O)NCn1c(=O)[nH]cc1)/C(=C/CN(C(=O)Nc1ccccc1)C)/C(=O)N2</chem>     | -10.96                   | 9.25       | 1.67  | 0.29 | 446.47        | 10    | 4     |
| Oxind_4_19 | <chem>c12c(cc(cc1)C(=O)NCn1c(=O)[nH]cc1)/C(=C/CNC(=O)c1ccccc1)/C(=O)N2</chem>         | -10.34                   | 26.34      | 0.85  | 0.00 | 417.43        | 9     | 4     |
| Oxind_5_1  | <chem>c12c(cc(cc1)C(=O)NCC1=CC(=NC1=O)NC)/C(=C/CCc1nonc1N)/C(=O)N2</chem>             | -10.5                    | 20.11      | -1.24 | 0.93 | 421.42        | 11    | 5     |
| Oxind_5_2  | <chem>c12c(cc(cc1)C(=O)NCC1=CC(=NC1=O)NC)/C(=C/CCCc1nc[nH]c1)/C(=O)N2</chem>          | -10.14                   | 36.92      | -0.34 | 0.69 | 418.46        | 9     | 4     |
| Oxind_5_9  | <chem>c12c(cc(cc1)C(=O)NCC1=CC(=NC1=O)NC)/C(=C/Cc1cc(cc1)NC)C(F)(F)F/C(=O)N2</chem>   | -11.22                   | 5.97       | 2.68  | 0.39 | 497.48        | 8     | 4     |
| Oxind_5_10 | <chem>c12c(cc(cc1)C(=O)NCC1=CC(=NC1=O)NC)/C(=C/Cc1cc(ccc1)C(=O)O)/C(=O)N2</chem>      | -11.1                    | 7.30       | 0.95  | 0.09 | 444.45        | 9     | 4     |
| Oxind_5_11 | <chem>c12c(cc(cc1)C(=O)NCC1=CC(=NC1=O)NC)/C(=C/Cc1ccnc(n1)N)/C(=O)N2</chem>           | -10.46                   | 21.51      | -0.67 | 0.68 | 417.43        | 10    | 5     |
| Oxind_5_12 | <chem>c12c(cc(cc1)C(=O)NCC1=CC(=NC1=O)NC)/C(=C/CNc1ccc(cc1)Br)/C(=O)N2</chem>         | -10.6                    | 16.99      | 1.89  | 0.43 | 494.35        | 8     | 4     |
| Oxind_5_13 | <chem>c12c(cc(cc1)C(=O)NCC1=CC(=NC1=O)NC)/C(=C/CC1CCNCC1)/C(=O)N2</chem>              | -10.7                    | 14.35      | 0.87  | 0.23 | 407.47        | 8     | 4     |
| Oxind_5_14 | <chem>c12c(cc(cc1)C(=O)NCC1=CC(=NC1=O)NC)/C(=C/CC1CCN(CC1)S(=O)(=O)C)/C(=O)N2</chem>  | -10.4                    | 23.81      | -0.77 | 0.01 | 485.57        | 10    | 3     |
| Oxind_5_15 | <chem>c12c(cc(cc1)C(=O)NCC1=CC(=NC1=O)NC)/C(=C/CCc1ccc(cc1)S(=O)(=O)N)/C(=O)N2</chem> | -11.1                    | 7.30       | -0.22 | 0.01 | 493.55        | 10    | 5     |
| Oxind_5_18 | <chem>c12c(cc(cc1)C(=O)NCC1=CC(=NC1=O)NC)/C(=C/CN(C(=O)Nc1ccccc1)C)/C(=O)N2</chem>    | -11.3                    | 5.21       | 0.84  | 0.31 | 472.5         | 10    | 4     |
| Oxind_5_19 | <chem>c12c(cc(cc1)C(=O)NCC1=CC(=NC1=O)NC)/C(=C/CNC(=O)c1ccccc1)/C(=O)N2</chem>        | -10.1                    | 39.50      | 0.45  | 0.00 | 443.46        | 9     | 4     |
| Oxind_9_1  | <chem>c12c(cc(cc1)C(=O)NCc1cc(cc1)NC)C(F)(F)F/C(=C/CCc1nonc1N)/C(=O)N2</chem>         | -10.3                    | 28.18      | 3.56  | 0.88 | 486.45        | 9     | 5     |

|             |                                                                                                |        |       |       |      |        |    |   |
|-------------|------------------------------------------------------------------------------------------------|--------|-------|-------|------|--------|----|---|
| Oxind_9_2   | <chem>c12c(cc(cc1)C(=O)NCc1cc(cc(c1)NC)C(F)(F)F)/C(=C/CCc1nc[nH]c1)/C(=O)N2</chem>             | -10.24 | 31.19 | 4.21  | 0.70 | 483.49 | 7  | 4 |
| Oxind_9_5   | <chem>c12c(cc(cc1)C(=O)NCc1cc(cc(c1)NC)C(F)(F)F)/C(=C/CC1=CC(=NC1=O)NC)/C(=O)N2</chem>         | -10.8  | 12.12 | 2.07  | 0.36 | 497.48 | 8  | 4 |
| Oxind_9_10  | <chem>c12c(cc(cc1)C(=O)NCc1cc(cc(c1)NC)C(F)(F)F)/C(=C/Cc1cc(ccc1)C(=O)O)/C(=O)N2</chem>        | -11.46 | 3.98  | 5.12  | 0.39 | 509.48 | 7  | 4 |
| Oxind_9_11  | <chem>c12c(cc(cc1)C(=O)NCc1cc(cc(c1)NC)C(F)(F)F)/C(=C/Cc1ccnc(n1)N)/C(=O)N2</chem>             | -10.8  | 12.12 | 3.28  | 0.69 | 482.47 | 8  | 5 |
| Oxind_9_12  | <chem>c12c(cc(cc1)C(=O)NCc1cc(cc(c1)NC)C(F)(F)F)/C(=C/CNc1ccc(cc1)Br)/C(=O)N2</chem>           | -10.38 | 24.62 | 5.90  | 0.59 | 559.39 | 6  | 4 |
| Oxind_9_13  | <chem>c12c(cc(cc1)C(=O)NCc1cc(cc(c1)NC)C(F)(F)F)/C(=C/CC1CCNCC1)/C(=O)N2</chem>                | -10.9  | 10.24 | 4.81  | 0.45 | 472.51 | 6  | 4 |
| Oxind_9_14  | <chem>c12c(cc(cc1)C(=O)NCc1cc(cc(c1)NC)C(F)(F)F)/C(=C/CC1CCN(CC1)S(=O)(=O)C)/C(=O)N2</chem>    | -10.58 | 17.57 | 3.68  | 0.05 | 550.6  | 8  | 3 |
| Oxind_9_15  | <chem>c12c(cc(cc1)C(=O)NCc1cc(cc(c1)NC)C(F)(F)F)/C(=C/CCc1ccc(cc1)S(=O)(=O)N)/C(=O)N2</chem>   | -11.2  | 6.17  | 3.64  | 0.19 | 558.58 | 8  | 5 |
| Oxind_9_18  | <chem>c12c(cc(cc1)C(=O)NCc1cc(cc(c1)NC)C(F)(F)F)/C(=C/CN(C(=O)Nc1ccccc1)C)/C(=O)N2</chem>      | -10.78 | 12.54 | 4.28  | 0.21 | 537.54 | 8  | 4 |
| Oxind_9_19  | <chem>c12c(cc(cc1)C(=O)NCc1cc(cc(c1)NC)C(F)(F)F)/C(=C/CNC(=O)c1ccccc1)/C(=O)N2</chem>          | -9.9   | 55.36 | 4.08  | 0.11 | 508.5  | 7  | 4 |
| Oxind_10_1  | <chem>c12c(cc(cc1)C(=O)NCc1cc(ccc1)C(=O)O)/C(=C/CCc1nonc1N)/C(=O)N2</chem>                     | -9.92  | 53.52 | 2.24  | 0.79 | 433.42 | 10 | 5 |
| Oxind_10_2  | <chem>c12c(cc(cc1)C(=O)NC[C@@H]1C[C@H](CCC1)C(=O)O)/C(=C/CCc1nc[nH]c1)/C(=O)N2</chem>          | -10.3  | 28.18 | 2.75  | 0.49 | 436.51 | 8  | 4 |
| Oxind_10_5  | <chem>c12c(cc(cc1)C(=O)NCc1cc(ccc1)C(=O)O)/C(=C/CC1=CC(=NC1=O)NC)/C(=O)N2</chem>               | -10.88 | 10.59 | 0.75  | 0.15 | 444.45 | 9  | 4 |
| Oxind_10_9  | <chem>c12c(cc(cc1)C(=O)NCc1cc(ccc1)C(=O)O)/C(=C/Cc1cc(cc(c1)NC)C(F)(F)F)/C(=O)N2</chem>        | -11.34 | 4.87  | 5.27  | 0.46 | 509.48 | 7  | 4 |
| Oxind_10_11 | <chem>c12c(cc(cc1)C(=O)NCc1cc(ccc1)C(=O)O)/C(=C/Cc1ccnc(n1)N)/C(=O)N2</chem>                   | -10.7  | 14.35 | 1.66  | 0.40 | 429.44 | 9  | 5 |
| Oxind_10_12 | <chem>c12c(cc(cc1)C(=O)NCc1cc(ccc1)C(=O)O)/C(=C/CNc1ccc(cc1)Br)/C(=O)N2</chem>                 | -10.6  | 16.99 | 4.50  | 0.51 | 506.36 | 7  | 4 |
| Oxind_10_13 | <chem>c12c(cc(cc1)C(=O)NCc1cc(ccc1)C(=O)O)/C(=C/CC1CCNCC1)/C(=O)N2</chem>                      | -10.9  | 10.24 | 3.38  | 0.28 | 419.48 | 7  | 4 |
| Oxind_10_14 | <chem>c12c(cc(cc1)C(=O)NC[C@@H]1C[C@H](CCC1)C(=O)O)/C(=C/CC1CCN(CC1)S(=O)(=O)C)/C(=O)N2</chem> | -11.02 | 8.36  | 1.82  | 0.04 | 503.62 | 9  | 3 |
| Oxind_10_15 | <chem>c12c(cc(cc1)C(=O)NCc1cc(ccc1)C(=O)O)/C(=C/CCc1ccc(cc1)S(=O)(=O)N)/C(=O)N2</chem>         | -11.22 | 5.97  | 2.32  | 0.45 | 505.55 | 9  | 5 |
| Oxind_10_18 | <chem>c12c(cc(cc1)C(=O)NC[C@@H]1C[C@H](CCC1)C(=O)O)/C(=C/CN(C(=O)Nc1ccccc1)C)/C(=O)N2</chem>   | -10.88 | 10.59 | 3.43  | 0.03 | 490.56 | 9  | 4 |
| Oxind_10_19 | <chem>c12c(cc(cc1)C(=O)NCc1cc(ccc1)C(=O)O)/C(=C/CNC(=O)c1ccccc1)/C(=O)N2</chem>                | -10.4  | 23.81 | 2.94  | 0.03 | 455.47 | 8  | 4 |
| Oxind_11_1  | <chem>c12c(cc(cc1)C(=O)NCc1ccnc(n1)N)/C(=C/CCc1nonc1N)/C(=O)N2</chem>                          | -10.46 | 21.51 | -0.42 | 0.94 | 406.41 | 11 | 6 |
| Oxind_11_2  | <chem>c12c(cc(cc1)C(=O)NCc1ccnc(n1)N)/C(=C/CCc1nc[nH]c1)/C(=O)N2</chem>                        | -10.5  | 20.11 | 1.11  | 0.88 | 403.45 | 9  | 5 |
| Oxind_11_5  | <chem>c12c(cc(cc1)C(=O)NCc1ccnc(n1)N)/C(=C/CC1=CC(=NC1=O)NC)/C(=O)N2</chem>                    | -11    | 8.65  | -1.61 | 0.72 | 417.43 | 10 | 5 |
| Oxind_11_9  | <chem>c12c(cc(cc1)C(=O)NCc1ccnc(n1)N)/C(=C/Cc1cc(cc(c1)NC)C(F)(F)F)/C(=O)N2</chem>             | -11.4  | 4.40  | 3.53  | 0.72 | 482.47 | 8  | 5 |
| Oxind_11_10 | <chem>c12c(cc(cc1)C(=O)NCc1ccnc(n1)N)/C(=C/Cc1cc(ccc1)C(=O)O)/C(=O)N2</chem>                   | -11.04 | 8.08  | 1.94  | 0.45 | 429.44 | 9  | 5 |
| Oxind_11_12 | <chem>c12c(cc(cc1)C(=O)NCc1ccnc(n1)N)/C(=C/CNc1ccc(cc1)Br)/C(=O)N2</chem>                      | -10.94 | 9.57  | 2.76  | 0.76 | 479.34 | 8  | 5 |
| Oxind_11_13 | <chem>c12c(cc(cc1)C(=O)NCc1ccnc(n1)N)/C(=C/CC1CCNCC1)/C(=O)N2</chem>                           | -11.12 | 7.06  | 1.56  | 0.68 | 392.46 | 8  | 5 |
| Oxind_11_14 | <chem>c12c(cc(cc1)C(=O)NCc1ccnc(n1)N)/C(=C/CC1CCN(CC1)S(=O)(=O)C)/C(=O)N2</chem>               | -11.5  | 3.72  | 0.26  | 0.66 | 470.56 | 10 | 4 |

|             |                                                                                         |        |       |       |      |        |    |   |
|-------------|-----------------------------------------------------------------------------------------|--------|-------|-------|------|--------|----|---|
| Oxind_11_15 | <chem>c12c(cc(cc1)C(=O)NCc1ccnc(n1)N)/C(=C/CCc1ccc(cc1)S(=O)(=O)N)/C(=O)N2</chem>       | -11.4  | 4.40  | 0.43  | 0.26 | 478.53 | 10 | 6 |
| Oxind_11_18 | <chem>c12c(cc(cc1)C(=O)NCc1ccnc(n1)N)/C(=C/CN(C(=O)Nc1ccccc1)C)/C(=O)N2</chem>          | -11.2  | 6.17  | 1.79  | 0.89 | 457.49 | 10 | 5 |
| Oxind_11_19 | <chem>c12c(cc(cc1)C(=O)NCc1ccnc(n1)N)/C(=C/CNC(=O)c1ccccc1)/C(=O)N2</chem>              | -11.08 | 7.56  | 0.77  | 0.37 | 428.45 | 9  | 5 |
| Oxind_12_1  | <chem>c12c(cc(cc1)C(=O)Nc1ccc(cc1)Br)/C(=C/CCc1nonc1N)/C(=O)N2</chem>                   | -10.8  | 12.12 | 2.19  | 0.85 | 454.28 | 8  | 4 |
| Oxind_12_2  | <chem>c12c(cc(cc1)C(=O)Nc1ccc(cc1)Br)/C(=C/CCc1nc[nH]c1)/C(=O)N2</chem>                 | -10.4  | 23.81 | 3.54  | 0.66 | 451.32 | 6  | 3 |
| Oxind_12_5  | <chem>c12c(cc(cc1)C(=O)Nc1ccc(cc1)Br)/C(=C/CC1=CC(=NC1=O)NC)/C(=O)N2</chem>             | -11.1  | 7.30  | 1.37  | 0.28 | 465.31 | 7  | 3 |
| Oxind_12_9  | <chem>c12c(cc(cc1)C(=O)Nc1ccc(cc1)Br)/C(=C/Cc1cc(ccc1)NC)C(F)(F)F)/C(=O)N2</chem>       | -11.98 | 1.65  | 6.03  | 0.66 | 530.34 | 5  | 3 |
| Oxind_12_10 | <chem>c12c(cc(cc1)C(=O)Nc1ccc(cc1)Br)/C(=C/Cc1cc(ccc1)C(=O)O)/C(=O)N2</chem>            | -11.9  | 1.89  | 4.37  | 0.59 | 477.31 | 6  | 3 |
| Oxind_12_11 | <chem>c12c(cc(cc1)C(=O)Nc1ccc(cc1)Br)/C(=C/Cc1ccnc(n1)N)/C(=O)N2</chem>                 | -11.14 | 6.83  | 2.39  | 0.57 | 450.3  | 7  | 4 |
| Oxind_12_13 | <chem>c12c(cc(cc1)C(=O)Nc1ccc(cc1)Br)/C(=C/CC1CCNCC1)/C(=O)N2</chem>                    | -11.2  | 6.17  | 4.29  | 0.55 | 440.34 | 5  | 3 |
| Oxind_12_14 | <chem>c12c(cc(cc1)C(=O)Nc1ccc(cc1)Br)/C(=C/CC1CCN(CC1)S(=O)(=O)C)/C(=O)N2</chem>        | -11.1  | 7.30  | 2.99  | 0.10 | 518.43 | 7  | 2 |
| Oxind_12_15 | <chem>c12c(cc(cc1)C(=O)Nc1ccc(cc1)Br)/C(=C/CCc1ccc(cc1)S(=O)(=O)N)/C(=O)N2</chem>       | -11.5  | 3.72  | 3.07  | 0.38 | 526.41 | 7  | 4 |
| Oxind_12_18 | <chem>c12c(cc(cc1)C(=O)Nc1ccc(cc1)Br)/C(=C/CN(C(=O)Nc1ccccc1)C)/C(=O)N2</chem>          | -10.88 | 10.59 | 3.48  | 0.18 | 505.37 | 7  | 3 |
| Oxind_12_19 | <chem>c12c(cc(cc1)C(=O)Nc1ccc(cc1)Br)/C(=C/CNC(=O)c1ccccc1)/C(=O)N2</chem>              | -10.66 | 15.35 | 3.47  | 0.16 | 476.33 | 6  | 3 |
| Oxind_13_1  | <chem>c12c(cc(cc1)C(=O)NC1CCNCC1)/C(=C/CCc1nonc1N)/C(=O)N2</chem>                       | -10.6  | 16.99 | 0.28  | 0.88 | 382.42 | 9  | 5 |
| Oxind_13_2  | <chem>c12c(cc(cc1)C(=O)NC1CCNCC1)/C(=C/CCc1nc[nH]c1)/C(=O)N2</chem>                     | -10.16 | 35.70 | 1.49  | 0.65 | 379.46 | 7  | 4 |
| Oxind_13_5  | <chem>c12c(cc(cc1)C(=O)NC1CCNCC1)[C@H](C(=O)N2)CCC1=CC(=NC1=O)NC</chem>                 | -11.1  | 7.30  | -0.78 | 0.24 | 395.46 | 8  | 4 |
| Oxind_13_9  | <chem>c12c(cc(cc1)C(=O)NC1CCNCC1)/C(=C/Cc1cc(ccc1)NC)C(F)(F)F)/C(=O)N2</chem>           | -11.7  | 2.65  | 4.26  | 0.53 | 458.48 | 6  | 4 |
| Oxind_13_10 | <chem>c12c(cc(cc1)C(=O)NC1CCNCC1)/C(=C/Cc1cc(ccc1)C(=O)O)/C(=O)N2</chem>                | -11.6  | 3.14  | 2.38  | 0.28 | 405.45 | 7  | 4 |
| Oxind_13_11 | <chem>c12c(cc(cc1)C(=O)NC1CCNCC1)/C(=C/Cc1ccnc(n1)N)/C(=O)N2</chem>                     | -10.9  | 10.24 | 0.69  | 0.64 | 378.44 | 8  | 5 |
| Oxind_13_12 | <chem>c12c(cc(cc1)C(=O)NC1CCNCC1)/C(=C/CNc1ccc(cc1)Br)/C(=O)N2</chem>                   | -10.8  | 12.12 | 3.37  | 0.51 | 455.36 | 6  | 4 |
| Oxind_13_14 | <chem>c12c(cc(cc1)C(=O)NC1CCNCC1)/C(=C/CC1CCN(CC1)S(=O)(=O)C)/C(=O)N2</chem>            | -10.9  | 10.24 | 1.33  | 0.02 | 446.57 | 8  | 3 |
| Oxind_13_15 | <chem>c12c(cc(cc1)C(=O)NC1CCNCC1)/C(=C/CCc1ccc(cc1)S(=O)(=O)N)/C(=O)N2</chem>           | -11.3  | 5.21  | 1.28  | 0.11 | 454.55 | 8  | 5 |
| Oxind_13_18 | <chem>c12c(cc(cc1)C(=O)NC1CCNCC1)/C(=C/CN(C(=O)Nc1ccccc1)C)/C(=O)N2</chem>              | -10.8  | 12.12 | 2.37  | 0.16 | 433.51 | 8  | 4 |
| Oxind_13_19 | <chem>c12c(cc(cc1)C(=O)NC1CCNCC1)/C(=C/CNC(=O)c1ccccc1)/C(=O)N2</chem>                  | -10.38 | 24.62 | 1.36  | 0.05 | 404.47 | 7  | 4 |
| Oxind_14_1  | <chem>S(=O)(=O)(C)N1CCC(NC(=O)c2cc3c(cc2)NC(=O)/C/3=C\CCc2nonc2N)CC1</chem>             | -9.66  | 83.01 | -0.39 | 0.96 | 460.52 | 11 | 4 |
| Oxind_14_2  | <chem>S(=O)(=O)(C)N1CCC(NC(=O)c2cc3c(cc2)NC(=O)/C/3=C\CCc2nc[nH]c2)CC1</chem>           | -9.66  | 83.01 | 1.45  | 0.49 | 457.56 | 9  | 3 |
| Oxind_14_5  | <chem>S(=O)(=O)(C)N1CCC(NC(=O)c2cc3c(cc2)NC(=O)/C/3=C\CC2=CC(=NC2=O)NC)CC1</chem>       | -9.8   | 65.54 | -1.32 | 0.02 | 471.54 | 10 | 3 |
| Oxind_14_9  | <chem>S(=O)(=O)(C)N1CCC(NC(=O)c2cc3c(cc2)NC(=O)/C/3=C\Cc2cc(ccc2)NC)C(F)(F)F)CC1</chem> | -10.84 | 11.33 | 3.48  | 0.13 | 536.58 | 8  | 3 |
| Oxind_14_10 | <chem>S(=O)(=O)(C)N1CCC(NC(=O)c2cc3c(cc2)NC(=O)/C/3=C\Cc2cc(ccc2)C(=O)O)CC1</chem>      | -10.72 | 13.87 | 1.79  | 0.05 | 483.55 | 9  | 3 |

|             |                                                                                             |        |        |       |      |        |    |   |
|-------------|---------------------------------------------------------------------------------------------|--------|--------|-------|------|--------|----|---|
| Oxind_14_11 | <chem>S(=O)(=O)(C)N1CCC(NC(=O)c2cc3c(cc2)NC(=O)/C/3=C\Cc2ccnc(n2)N)CC1</chem>               | -10.34 | 26.34  | -0.04 | 0.63 | 456.53 | 10 | 4 |
| Oxind_14_12 | <chem>S(=O)(=O)(C)N1CCC(NC(=O)c2cc3c(cc2)NC(=O)/C/3=C\CNc2ccc(cc2)Br)CC1</chem>             | -10.12 | 38.19  | 2.64  | 0.15 | 533.45 | 8  | 3 |
| Oxind_14_13 | <chem>S(=O)(=O)(C)N1CCC(NC(=O)c2cc3c(cc2)NC(=O)/C/3=C\CC2CCNCC2)CC1</chem>                  | -10.34 | 26.34  | 1.45  | 0.02 | 446.57 | 8  | 3 |
| Oxind_14_15 | <chem>S(=O)(=O)(C)N1CCC(NC(=O)c2cc3c(cc2)NC(=O)/C/3=C\CCc2ccc(cc2)S(=O)(=O)N)CC1</chem>     | -10.24 | 31.19  | 0.65  | 0.00 | 532.64 | 10 | 4 |
| Oxind_14_18 | <chem>S(=O)(=O)(C)N1CCC(NC(=O)c2cc3c(cc2)NC(=O)/C/3=C\CN(C(=O)Nc2ccccc2)C)CC1</chem>        | -9.2   | 180.43 | 1.73  | 0.00 | 511.6  | 10 | 3 |
| Oxind_14_19 | <chem>S(=O)(=O)(C)N1CCC(NC(=O)c2cc3c(cc2)NC(=O)/C/3=C\CNC(=O)c2ccccc2)CC1</chem>            | -9.66  | 83.01  | 0.70  | 0.00 | 482.56 | 9  | 3 |
| Oxind_15_1  | <chem>c12c(cc(cc1)C(=O)NCc1ccc(cc1)S(=O)(=O)N)/C(=C/CCc1nonc1N)/C(=O)N2</chem>              | -10.1  | 39.50  | -1.34 | 0.87 | 468.5  | 11 | 6 |
| Oxind_15_2  | <chem>c12c(cc(cc1)C(=O)NCc1ccc(cc1)S(=O)(=O)N)/C(=C/CCc1nc[nH]c1)/C(=O)N2</chem>            | -10.5  | 20.11  | 0.28  | 0.29 | 465.54 | 9  | 5 |
| Oxind_15_5  | <chem>c12c(cc(cc1)C(=O)NCc1ccc(cc1)S(=O)(=O)N)/C(=C/CC1=CC(=NC1=O)NC)/C(=O)N2</chem>        | -10.76 | 12.97  | -2.23 | 0.02 | 479.52 | 10 | 5 |
| Oxind_15_9  | <chem>c12c(cc(cc1)C(=O)NCc1ccc(cc1)S(=O)(=O)N)/C(=C/Cc1cc(cc(c1)NC)C(F)(F)F)/C(=O)N2</chem> | -11.12 | 7.06   | 2.58  | 0.25 | 544.55 | 8  | 5 |
| Oxind_15_10 | <chem>c12c(cc(cc1)C(=O)NCc1ccc(cc1)S(=O)(=O)N)/C(=C/Cc1ccc(cc1)C(=O)O)/C(=O)N2</chem>       | -11.12 | 7.06   | 1.00  | 0.49 | 491.52 | 9  | 5 |
| Oxind_15_11 | <chem>c12c(cc(cc1)C(=O)NCc1ccc(cc1)S(=O)(=O)N)/C(=C/Cc1ccnc(n1)N)/C(=O)N2</chem>            | -10.48 | 20.80  | -0.85 | 0.24 | 464.51 | 10 | 6 |
| Oxind_15_12 | <chem>c12c(cc(cc1)C(=O)NCc1ccc(cc1)S(=O)(=O)N)/C(=C/CNc1ccc(cc1)Br)/C(=O)N2</chem>          | -10.3  | 28.18  | 1.95  | 0.30 | 541.43 | 8  | 5 |
| Oxind_15_13 | <chem>c12c(cc(cc1)C(=O)NCc1ccc(cc1)S(=O)(=O)N)/C(=C/CC1CCNCC1)/C(=O)N2</chem>               | -10.64 | 15.88  | 0.66  | 0.14 | 454.55 | 8  | 5 |
| Oxind_15_14 | <chem>c12c(cc(cc1)C(=O)NCc1ccc(cc1)S(=O)(=O)N)/C(=C/CC1CCN(CC1)S(=O)(=O)C)/C(=O)N2</chem>   | -11.2  | 6.17   | -0.79 | 0.00 | 532.64 | 10 | 4 |
| Oxind_15_18 | <chem>C12C(CCC(C1)C(=O)NCc1ccc(cc1)S(=O)(=O)N)/C(=C/CN(C(=O)NC1CCCCC1)C)/C(=O)N2</chem>     | -11.54 | 3.48   | 0.77  | 0.00 | 531.68 | 10 | 5 |
| Oxind_15_19 | <chem>c12c(cc(cc1)C(=O)NCc1ccc(cc1)S(=O)(=O)N)/C(=C/CNC(=O)c1ccccc1)/C(=O)N2</chem>         | -10.28 | 29.15  | 0.10  | 0.01 | 490.54 | 9  | 5 |
| Oxind_20_1  | <chem>c12c(cc(cc1)C(=O)NCCc1ccc(cc1)N)/C(=C/Cc1cc(ccc1)C(=O)O)/C(=O)N2</chem>               | -10.4  | 23.81  | 1.26  | 0.39 | 441.49 | 7  | 5 |
| Oxind_20_2  | <chem>c12c(cc(cc1)C(=O)NCCc1ccc(cc1)N)/C(=C/CCc1nc[nH]c1)/C(=O)N2</chem>                    | -9.96  | 50.03  | 2.50  | 0.53 | 415.5  | 7  | 5 |
| Oxind_20_5  | <chem>c12c(cc(cc1)C(=O)NCCc1ccc(cc1)N)/C(=C/CC1=CC(=NC1=O)NC)/C(=O)N2</chem>                | -10.5  | 20.11  | 0.23  | 0.16 | 429.48 | 8  | 5 |
| Oxind_20_9  | <chem>c12c(cc(cc1)C(=O)NCCc1ccc(cc1)N)/C(=C/Cc1cc(cc(c1)NC)C(F)(F)F)/C(=O)N2</chem>         | -10.9  | 10.24  | 5.41  | 0.50 | 494.52 | 6  | 5 |
| Oxind_20_10 | <chem>c12c(cc(cc1)C(=O)NCCc1ccc(cc1)N)/C(=C/Cc1cc(ccc1)C(=O)O)/C(=O)N2</chem>               | -10.6  | 16.99  | 3.61  | 0.39 | 441.49 | 7  | 5 |
| Oxind_20_11 | <chem>c12c(cc(cc1)C(=O)NCCc1ccc(cc1)N)/C(=C/Cc1ccnc(n1)N)/C(=O)N2</chem>                    | -10.3  | 28.18  | 1.81  | 0.46 | 414.47 | 8  | 6 |
| Oxind_20_12 | <chem>c12c(cc(cc1)C(=O)NCCc1ccc(cc1)N)/C(=C/CNc1ccc(cc1)Br)/C(=O)N2</chem>                  | -10.5  | 20.11  | 4.53  | 0.54 | 491.39 | 6  | 5 |
| Oxind_20_13 | <chem>c12c(cc(cc1)C(=O)NCCc1ccc(cc1)N)/C(=C/CC1CCNCC1)/C(=O)N2</chem>                       | -10.54 | 18.80  | 3.15  | 0.40 | 404.51 | 6  | 5 |
| Oxind_20_14 | <chem>c12c(cc(cc1)C(=O)NCCc1ccc(cc1)N)/C(=C/CC1CCN(CC1)S(=O)(=O)C)/C(=O)N2</chem>           | -10.3  | 28.18  | 1.92  | 0.02 | 482.61 | 8  | 4 |
| Oxind_20_15 | <chem>c12c(cc(cc1)C(=O)NCCc1ccc(cc1)N)/C(=C/CCc1ccc(cc1)S(=O)(=O)N)/C(=O)N2</chem>          | -10.9  | 10.24  | 2.18  | 0.19 | 490.58 | 8  | 6 |
| Oxind_20_18 | <chem>c12c(cc(cc1)C(=O)NCCc1ccc(cc1)N)/C(=C/CN(C(=O)Nc1ccccc1)C)/C(=O)N2</chem>             | -10.88 | 10.59  | 3.21  | 0.06 | 469.55 | 8  | 5 |
| Oxind_20_19 | <chem>c12c(cc(cc1)C(=O)NCCc1ccc(cc1)N)/C(=C/CNC(=O)c1ccccc1)/C(=O)N2</chem>                 | -10.1  | 39.50  | 2.49  | 0.10 | 440.5  | 7  | 5 |
